# Supplementary material for: Adenosine Induces EBV Lytic Reactivation through ADORA1 in EBV-Associated Gastric Carcinoma
Source: MDPI journal article supplement (doi:10.3390/ijms20061286), 2019-03-14
Supplement: s1 [file s1]

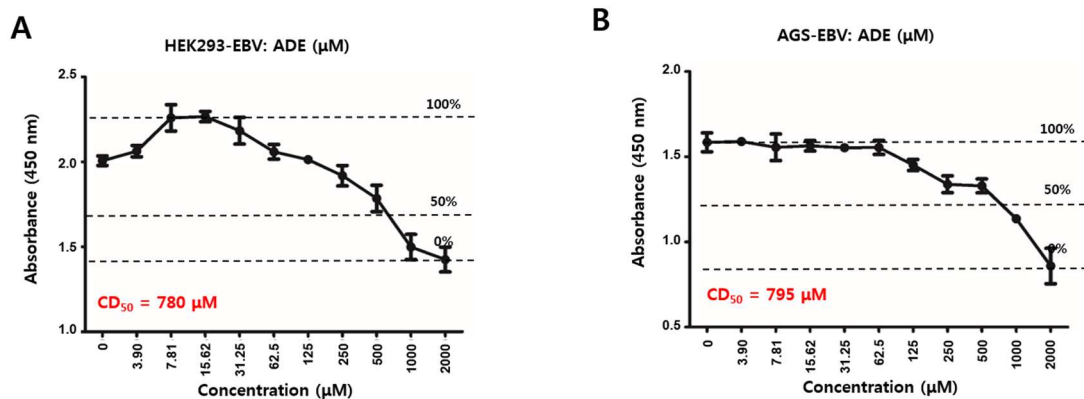

**Figure S1.** Cytotoxicity for adenosine in HEK293-EBV and AGS-EBV cells. **(A)** Measurement of cytotoxicity of adenosine for 48 h from HEK293-EBV cells; **(B)** Measurement of cytotoxicity of adenosine for 48 h from AGS-EBV cells.

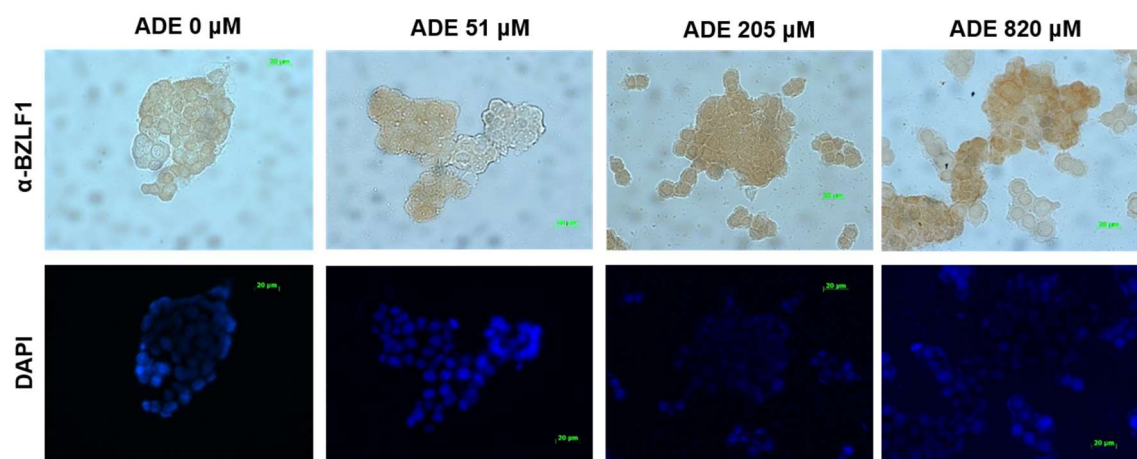

**Figure S2.** Immunocytochemistry (ICA) assay of SNU719 cells treated with adenosine. Determination of Zta expression in SUN719 cells treated with adenosine. SNU719 cells were methanol-fixed, permeabilized, and probed with mouse anti-Zta antibody and HRP-conjugated goat anti-mouse IgG antibody. HRP was detected using DAB substrate kit. As control, nucleus in SNU719 cells were stained with DAPI.

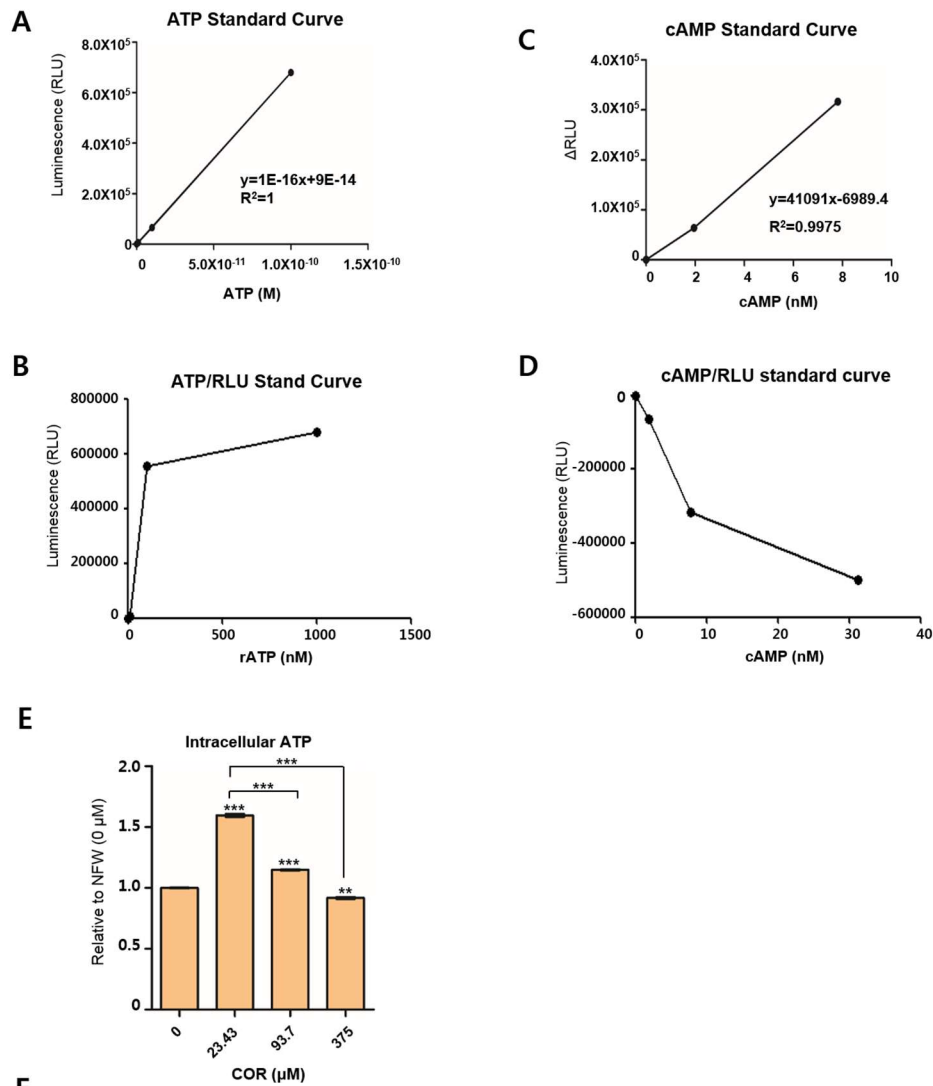

**Figure S3.** Measurement of ATP or cAMP standard curve and ATP induction by cordycepin. (A) ATP standard curve for ATP (moles) and Renilla luciferase activity (RLU); (B) ATP/RLU standard curve for rATP (nano moles) and Renilla luciferase activity (RLU); (C) cAMP standard curve for cAMP (moles) and Renilla luciferase activity (RLU); (D) Measurement of net cAMP induction by adenosine in SNU719 cells. Net cAMP levels were represented as RLU directly relative to the adenosine concentration; (E) Measurement of ATP induction by cordycepin in SNU719 cells. SNU719 cells were treated with 23.43, 93.70, and 375.00  $\mu$ M of cordycepin for 48 h. ATP levels are represented relative to the NFW control (0  $\mu$ M); (F) Luminescence of ATP and cAMP standard. ADE, COR and NFW = adenosine, cordycepin and nuclease-free water, respectively. \*\*  $p < 0.01$ , \*\*\*  $p < 0.001$  (Student's  $t$ -test).

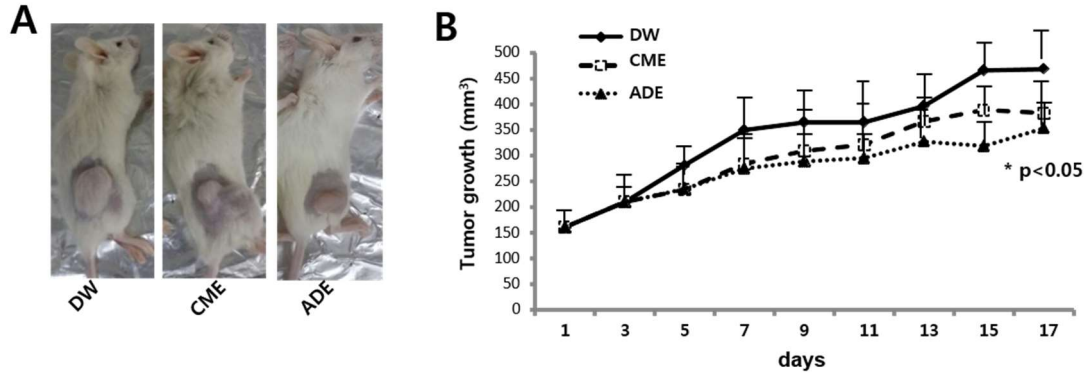

**Figure S4.** Inhibition of SNU719 development in xenograft mouse by CME and adenosine. **(A)** Representative image of a NOD/SCID mouse bearing MKN1-EBV cells-derived tumors; **(B)** Determination of the anti-tumor effects of CME and adenosine on the development of MKN1-EBV cells-derived tumors in NOD/SCID mice. Each experimental groups were served drinking water, CME (100 mg/kg/day) and ADE (30 mg/kg/day). CME, ADE, and DW = *Cordyceps militaris* extracts, adenosine, and drinking water, respectively.
